# Supplementary material for: Comparisons of disease cluster patterns, prevalence and health factors in the USA, Canada, England and Ireland
Source: Springer Nature journal article supplement (doi:10.1186/s12889-021-11706-8), 2021-09-15
Supplement: MOESM5 [file 19665700]

**a**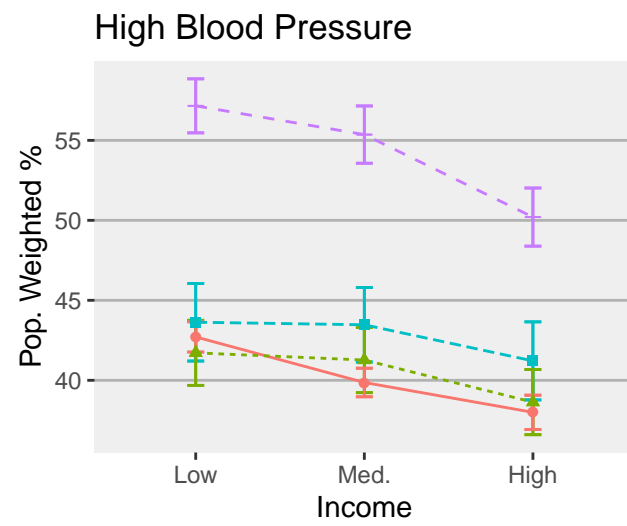**b**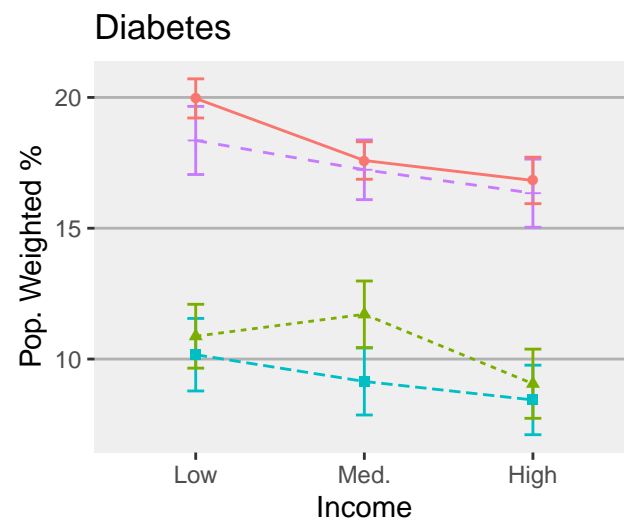**c**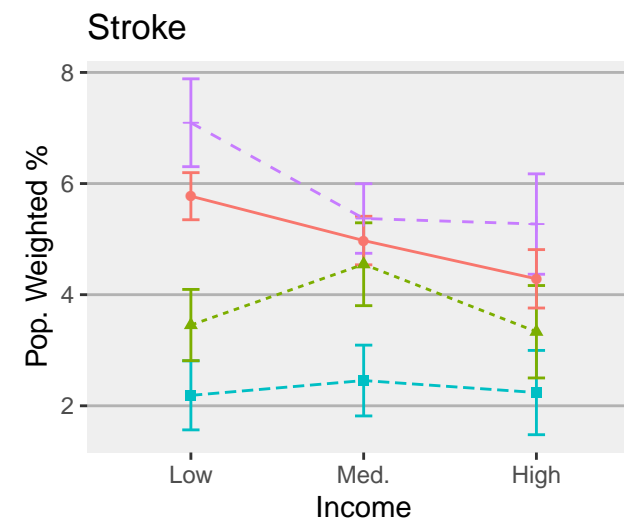**d**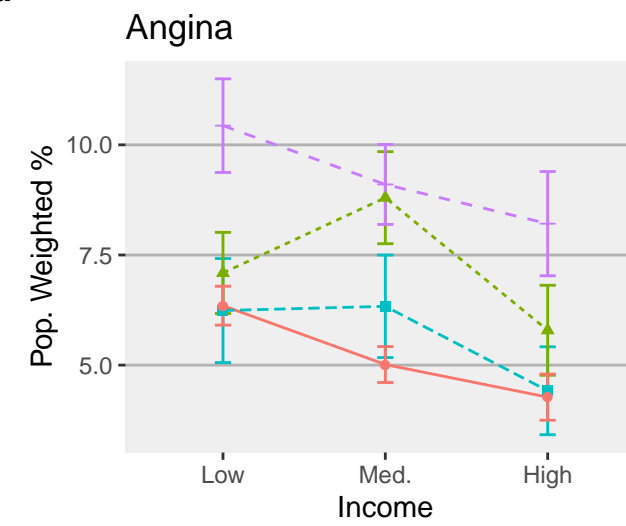**e**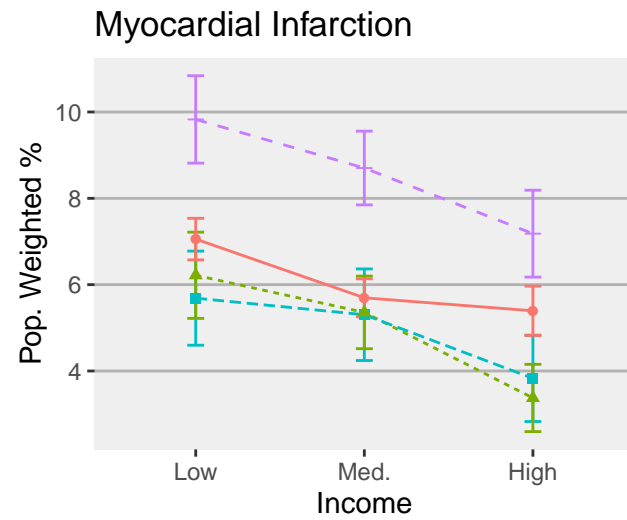**f**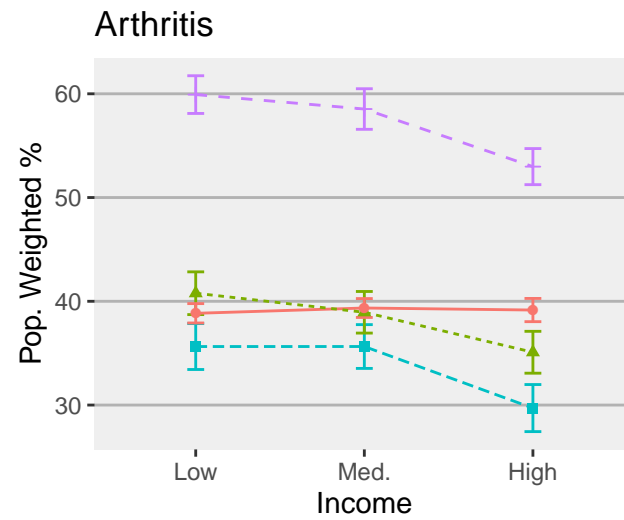**g**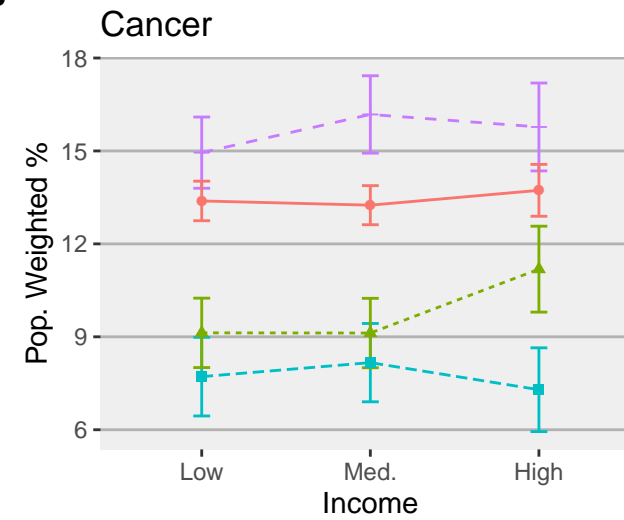**h**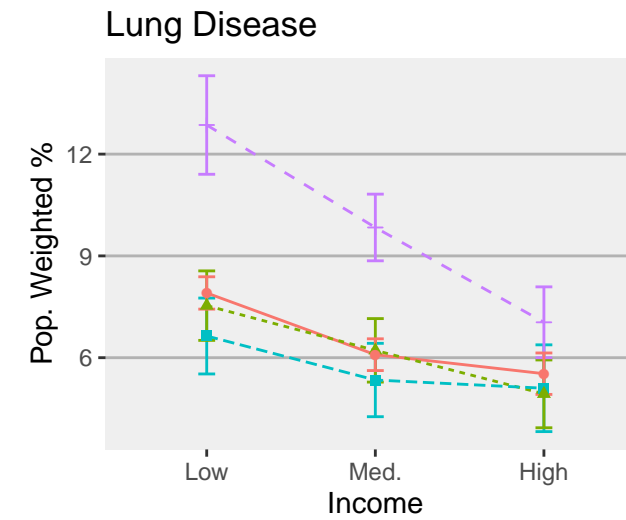**i**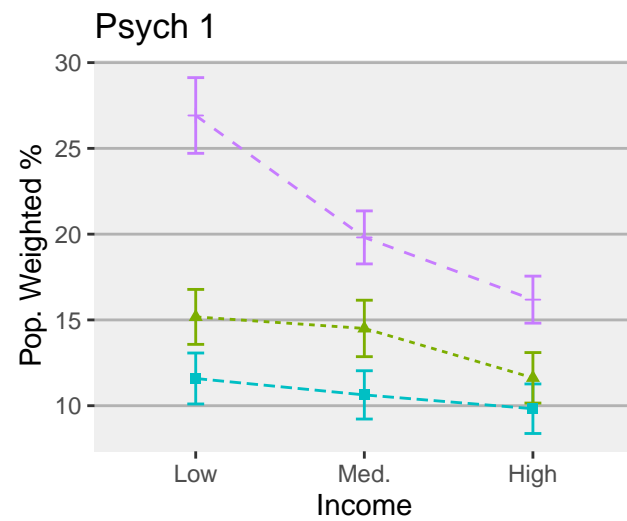**j**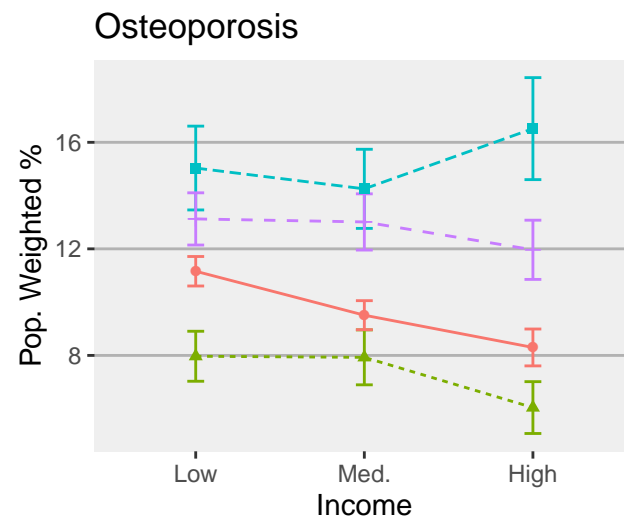

● Canada 
 ▲ England 
 ■ Ireland 
 + USA
