# Supplementary material for: Comparisons of disease cluster patterns, prevalence and health factors in the USA, Canada, England and Ireland
Source: Springer Nature journal article supplement (doi:10.1186/s12889-021-11706-8), 2021-09-15
Supplement: MOESM6 [file 19665700]

**a****High Blood Pressure**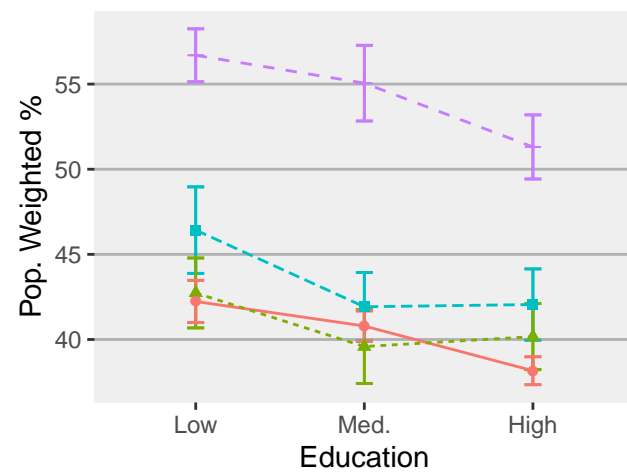**b****Diabetes**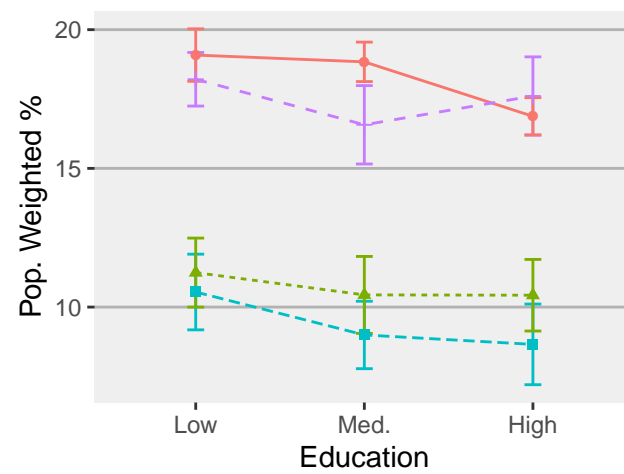**c****Stroke**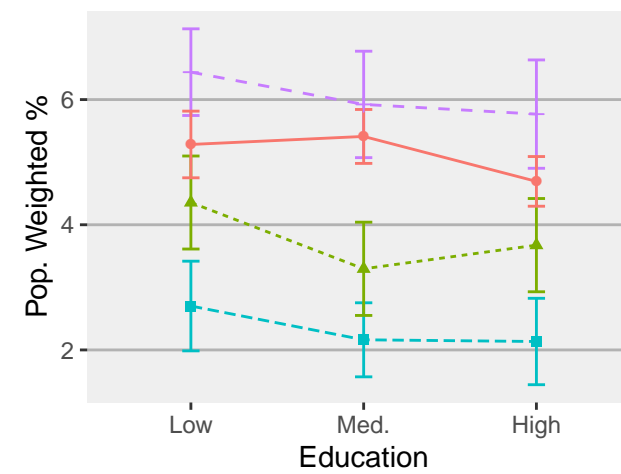**d****Angina**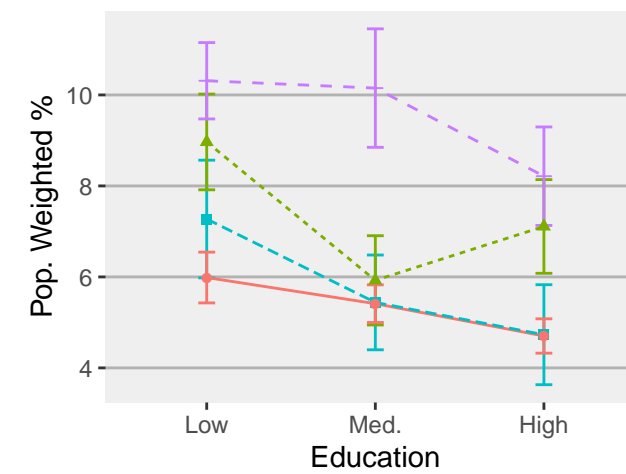**e****Myocardial Infarction**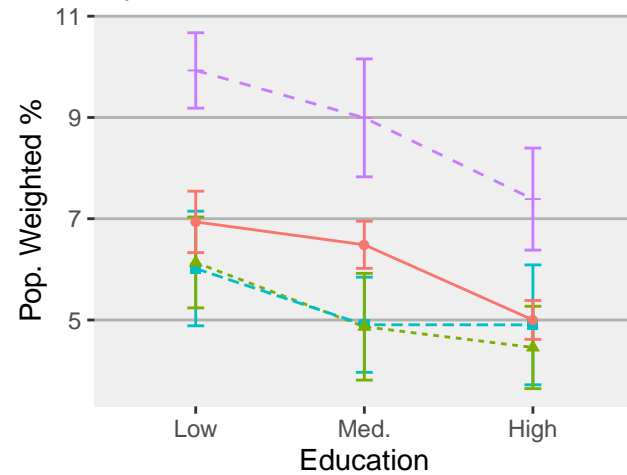**f****Arthritis**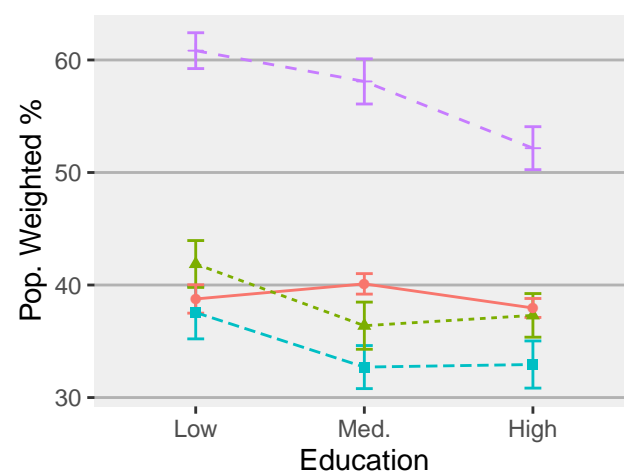**g****Cancer**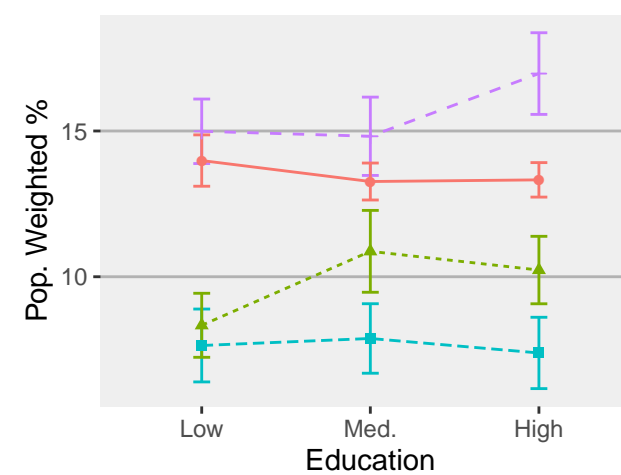**h****Lung Disease**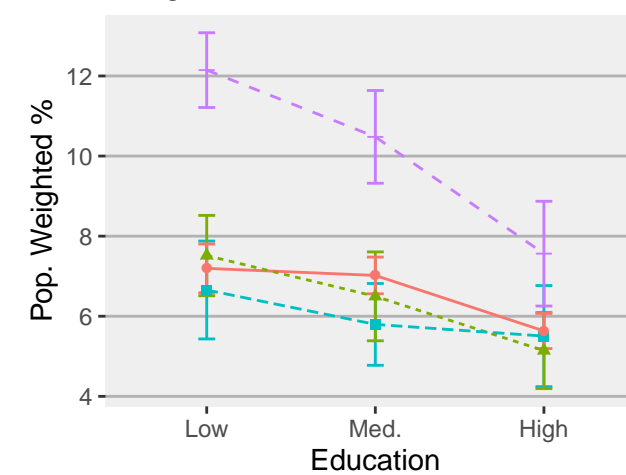**i****Psych 1**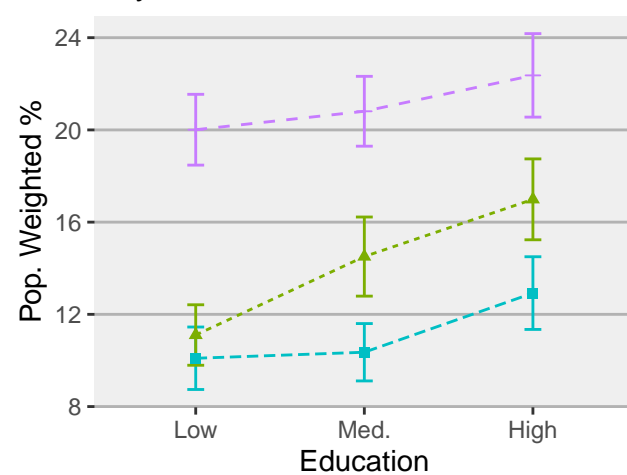**j****Osteoporosis**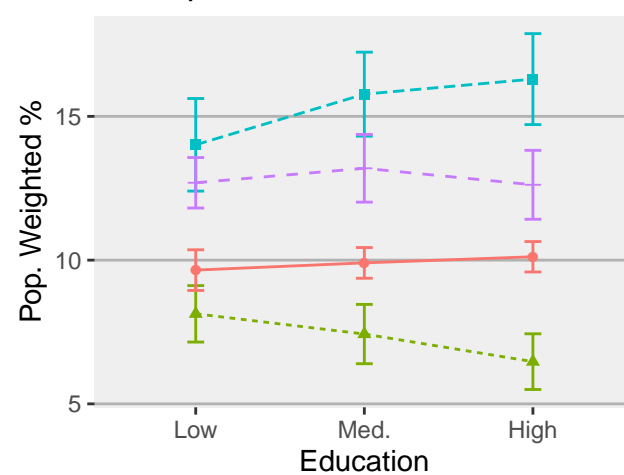

—●— Canada 
 —▲— England 
 —■— Ireland 
 - - - + USA
