# Supplementary material for: Comparisons of disease cluster patterns, prevalence and health factors in the USA, Canada, England and Ireland
Source: Springer Nature journal article supplement (doi:10.1186/s12889-021-11706-8), 2021-09-15

# U.S.A Breakdown of Disease Patterns by Risk Factors

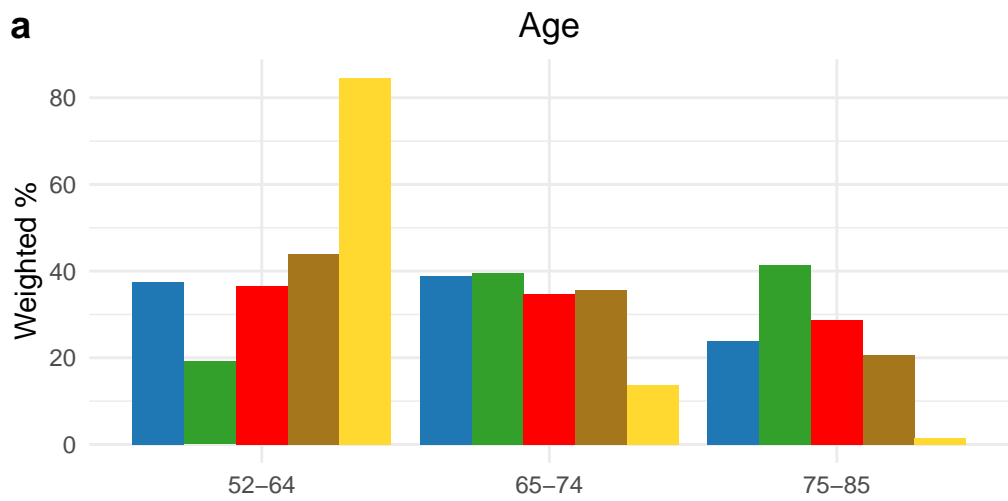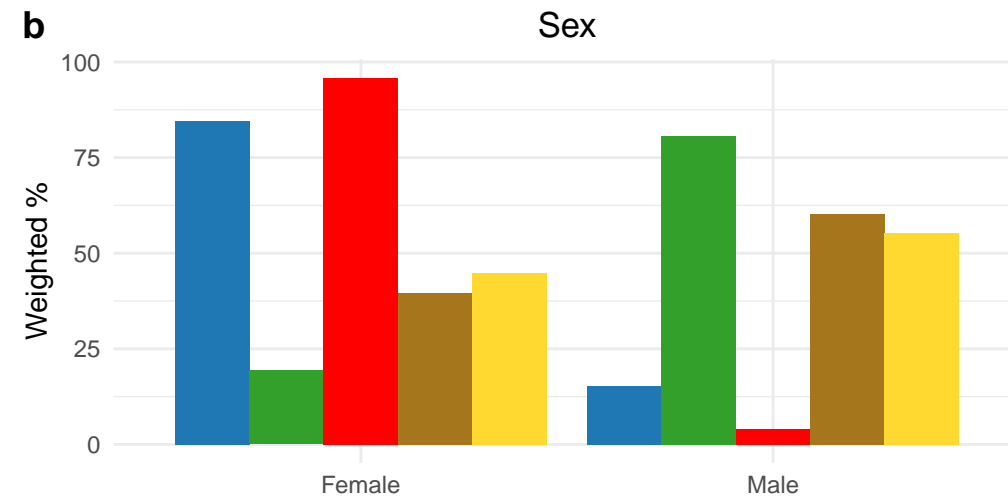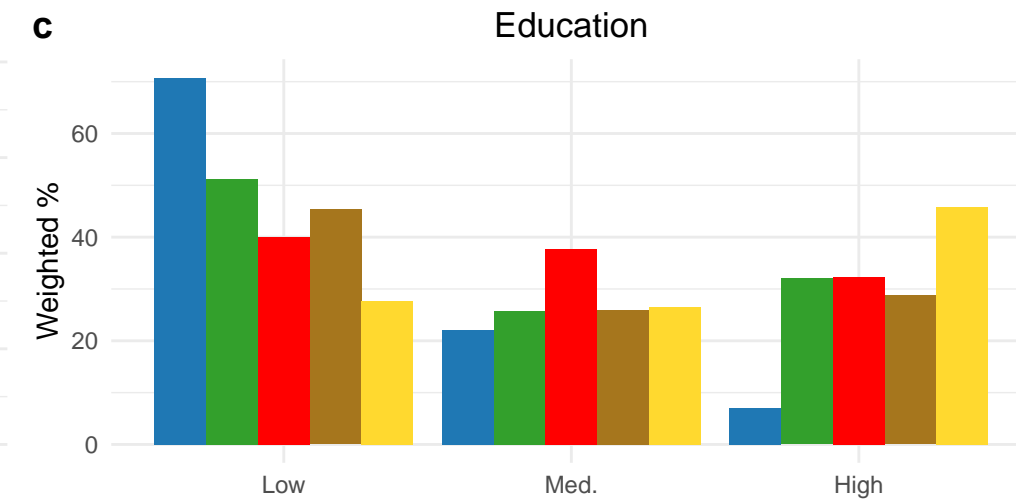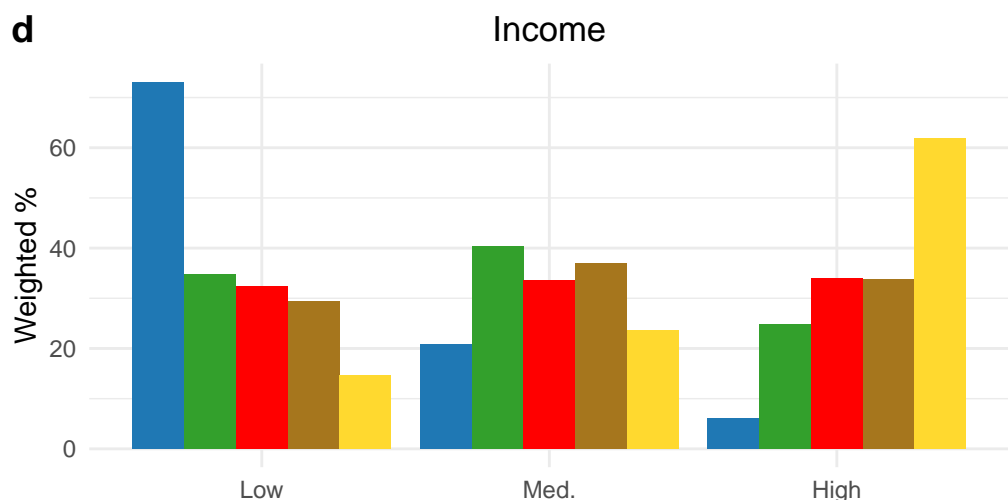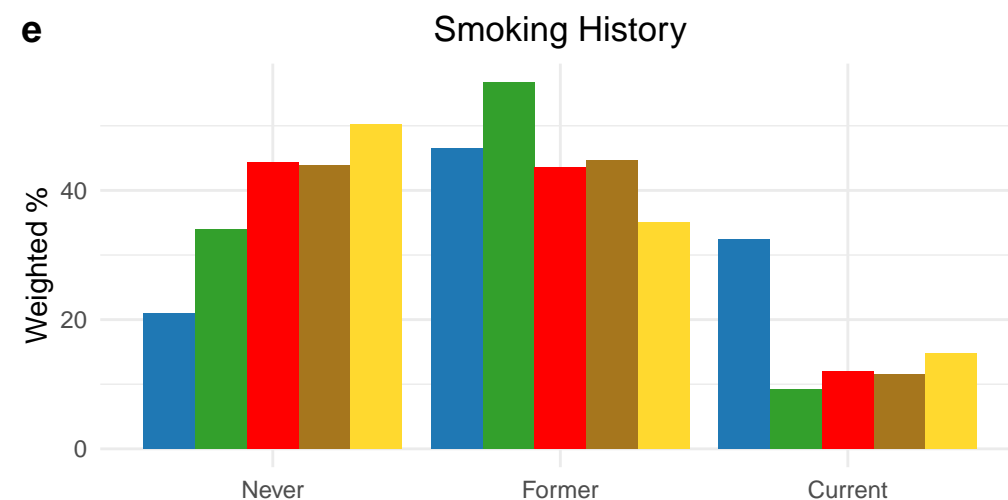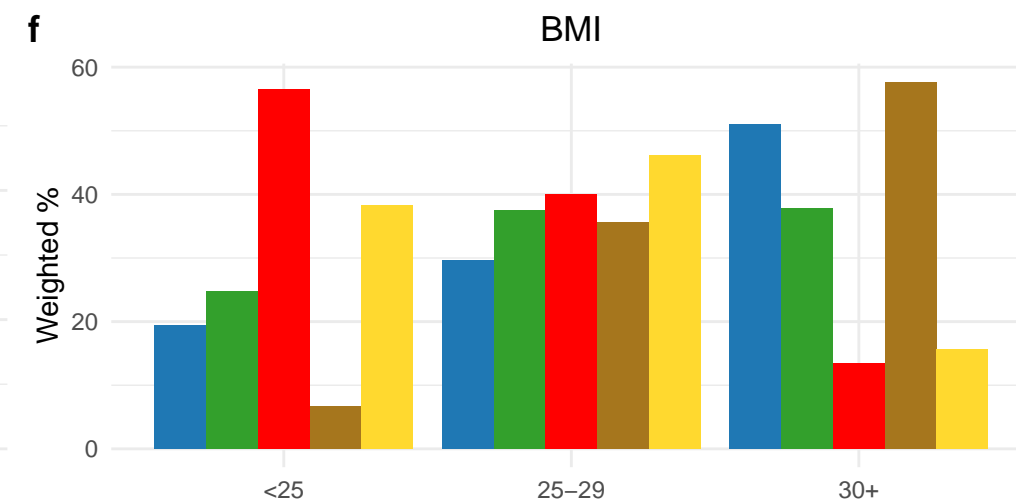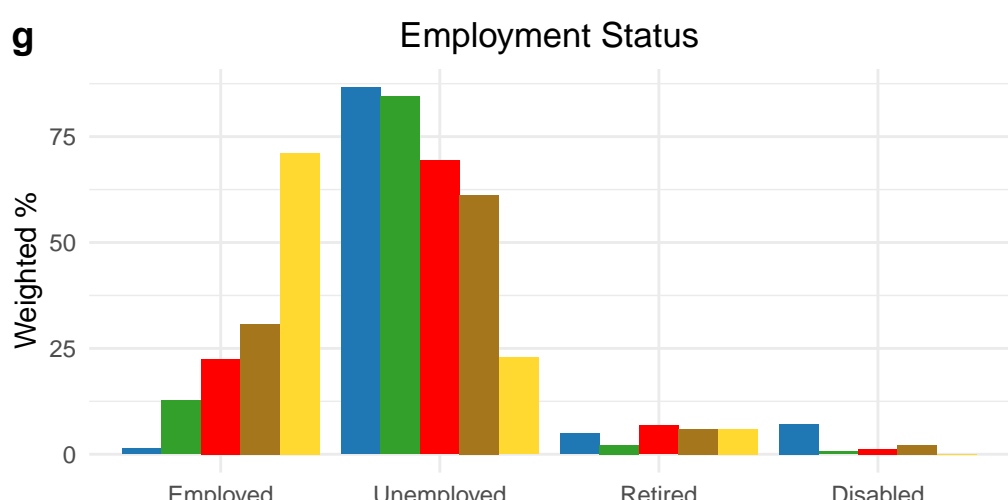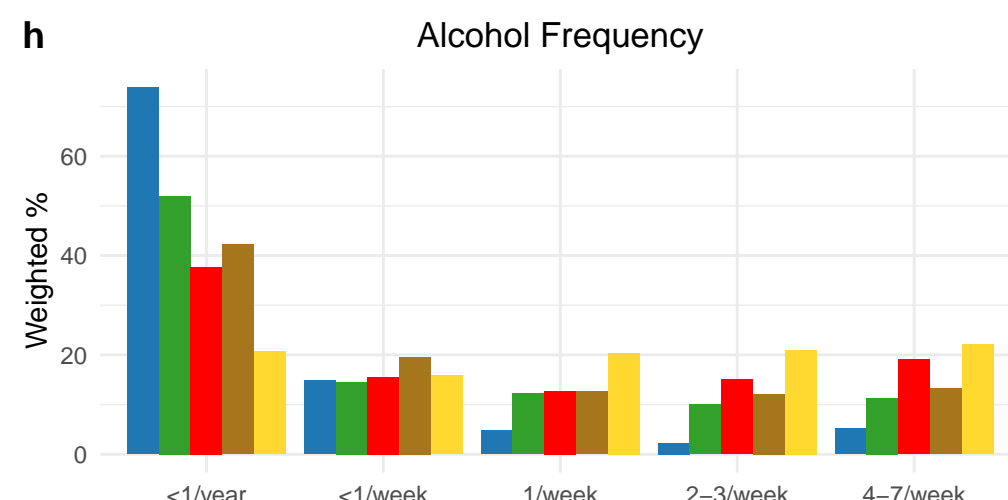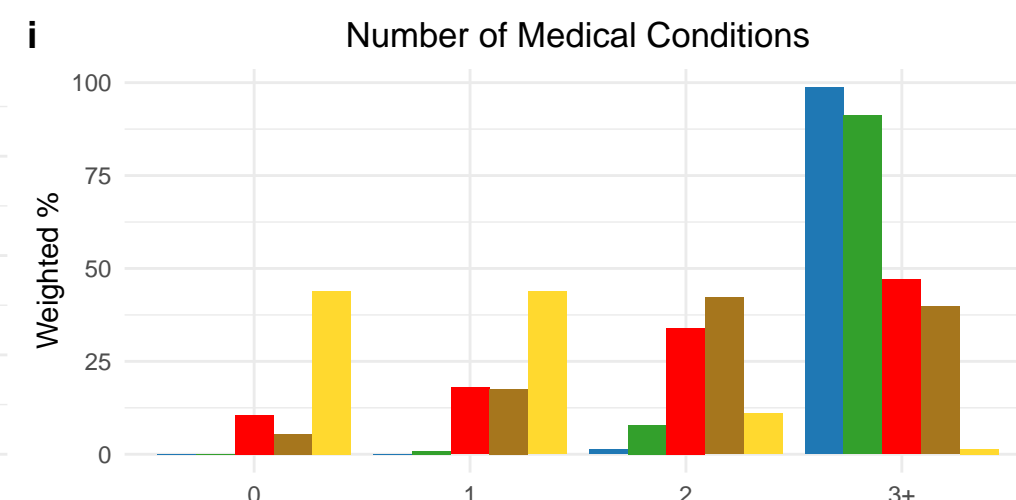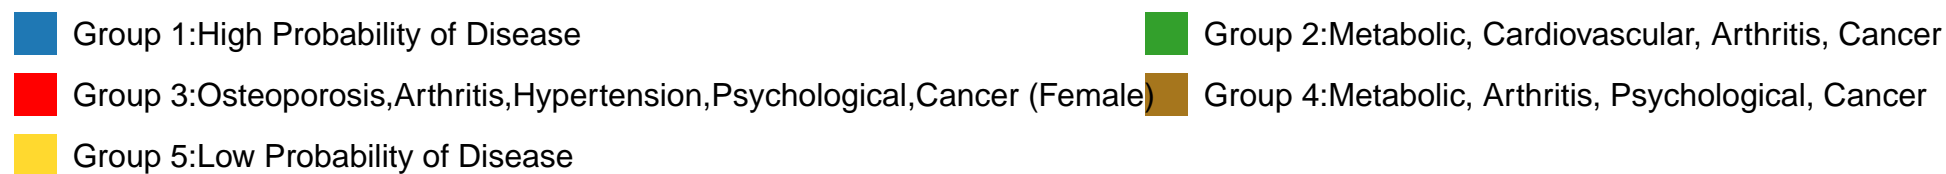

Supplement: MOESM8 [file 19665700]
