# Supplementary material for: Comparisons of disease cluster patterns, prevalence and health factors in the USA, Canada, England and Ireland
Source: Springer Nature journal article supplement (doi:10.1186/s12889-021-11706-8), 2021-09-15
Supplement: MOESM9 [file 19665700]

# Canada Breakdown of Disease Patterns by Risk Factors

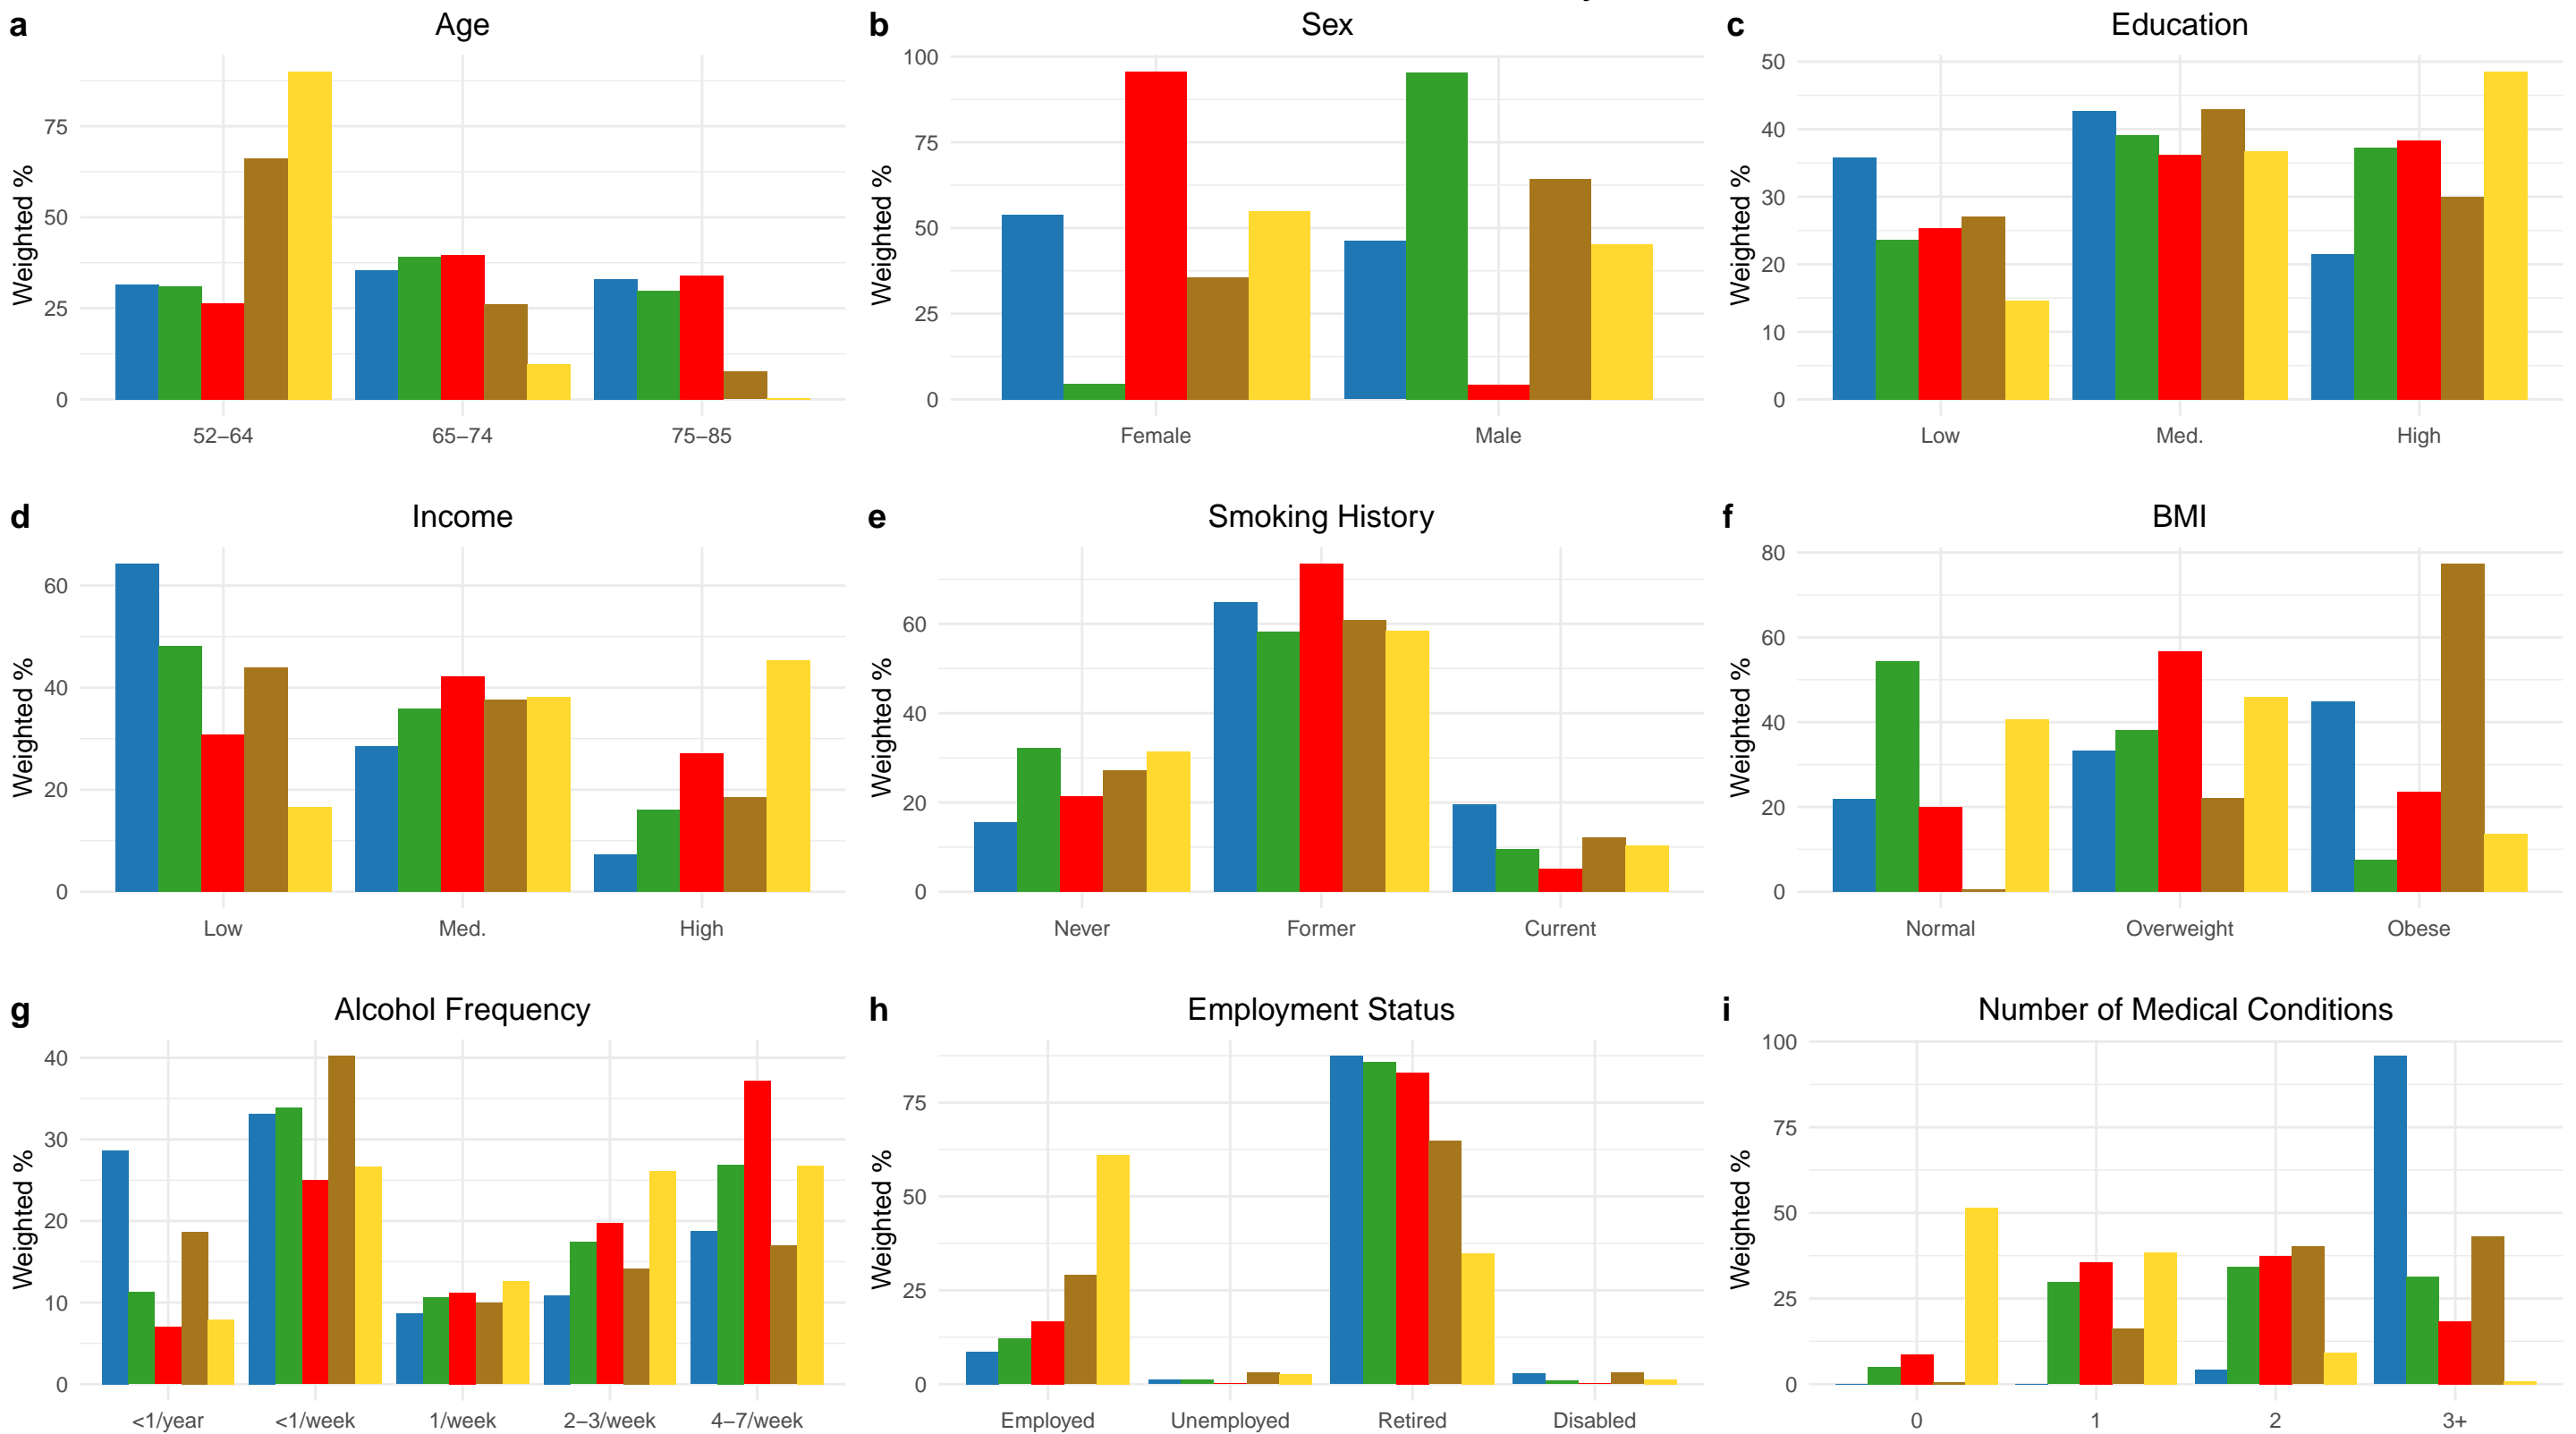

- Group 1: High Probability of Disease
  - Group 3: Osteoporosis, Arthritis, Hypertension, Psychological, Cancer (Female)
  - Group 5: Low Probability of Disease
- Group 2: Metabolic, Arthritis, Cancer
  - Group 4: Metabolic, Arthritis, Psychological
