# Supplementary material for: Comparisons of disease cluster patterns, prevalence and health factors in the USA, Canada, England and Ireland
Source: Springer Nature journal article supplement (doi:10.1186/s12889-021-11706-8), 2021-09-15
Supplement: MOESM10 [file 19665700]

# England Breakdown of Disease Patterns by Risk Factors

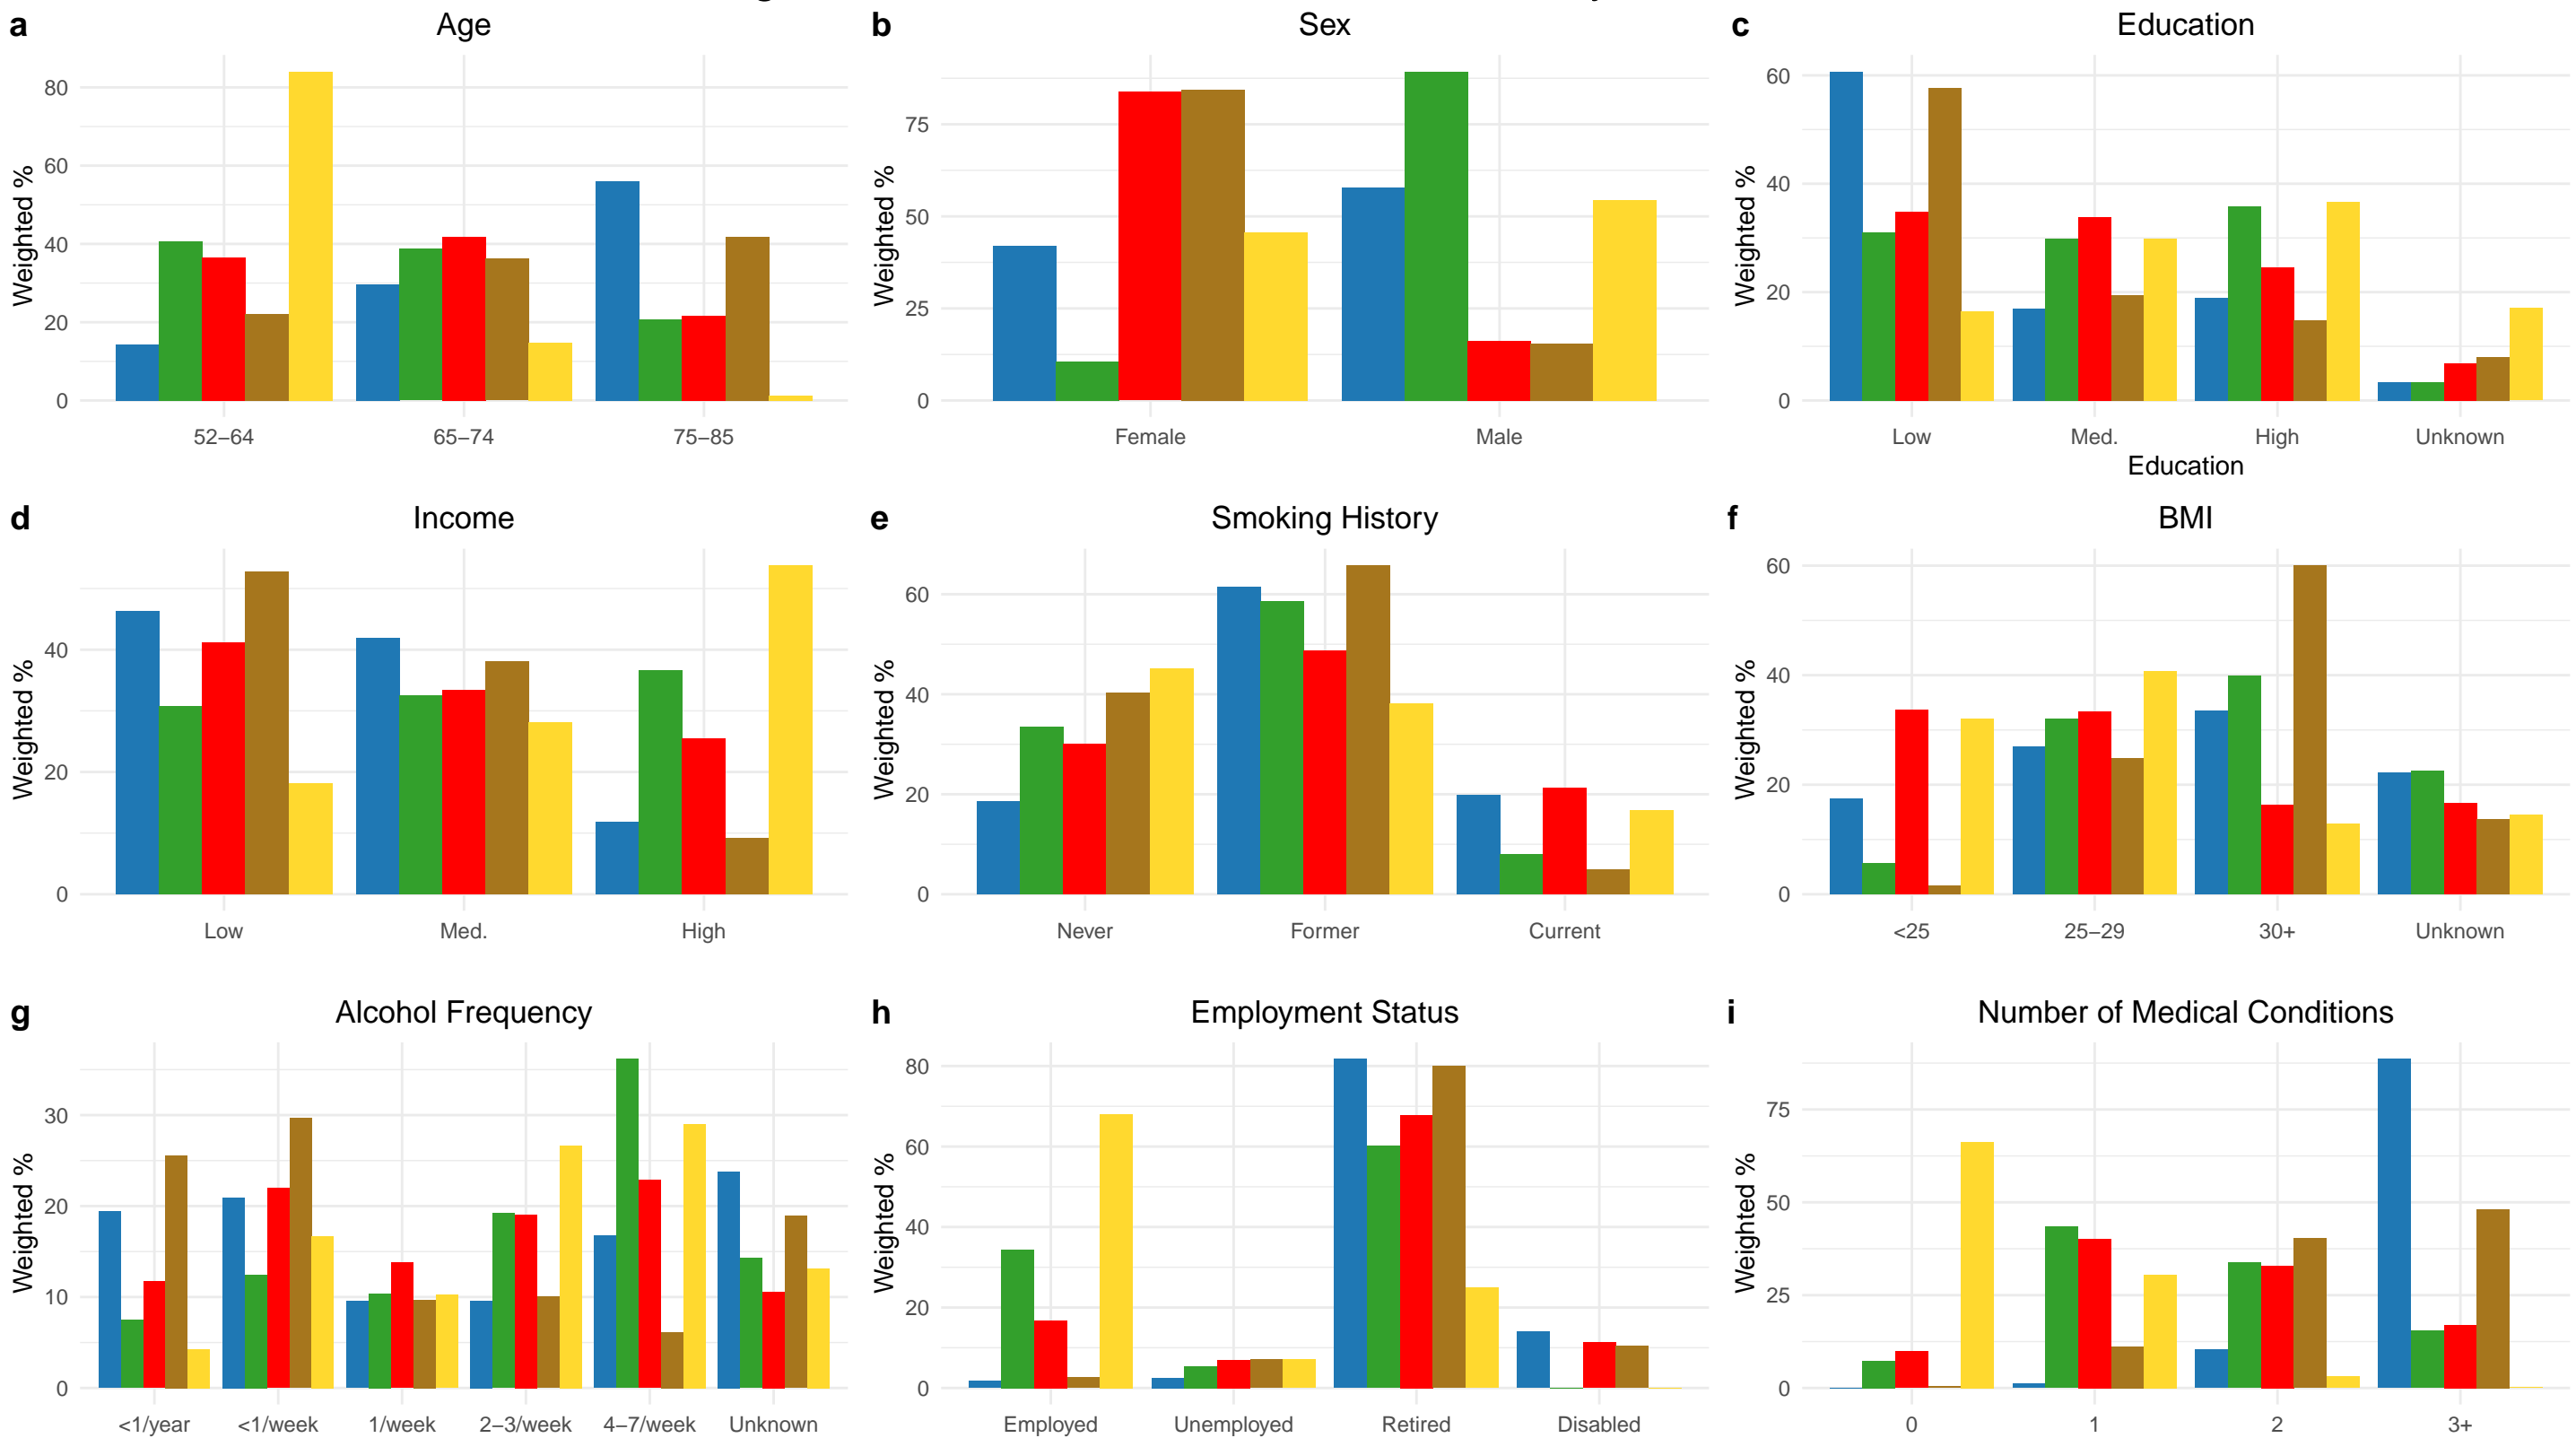

■ Group 1: High Probability of Disease
 ■ Group 2: Metabolic, Arthritis
 ■ Group 3: Osteoporosis, Arthritis, Hypertension, Psychological(Female)
 ■ Group 4: Metabolic, High Prob. Arthritis
 ■ Group 5: Low Probability of Disease
