# Supplementary material for: Comparisons of disease cluster patterns, prevalence and health factors in the USA, Canada, England and Ireland
Source: Springer Nature journal article supplement (doi:10.1186/s12889-021-11706-8), 2021-09-15
Supplement: MOESM11 [file 19665700]

# Ireland Breakdown of Disease Patterns by Risk Factors

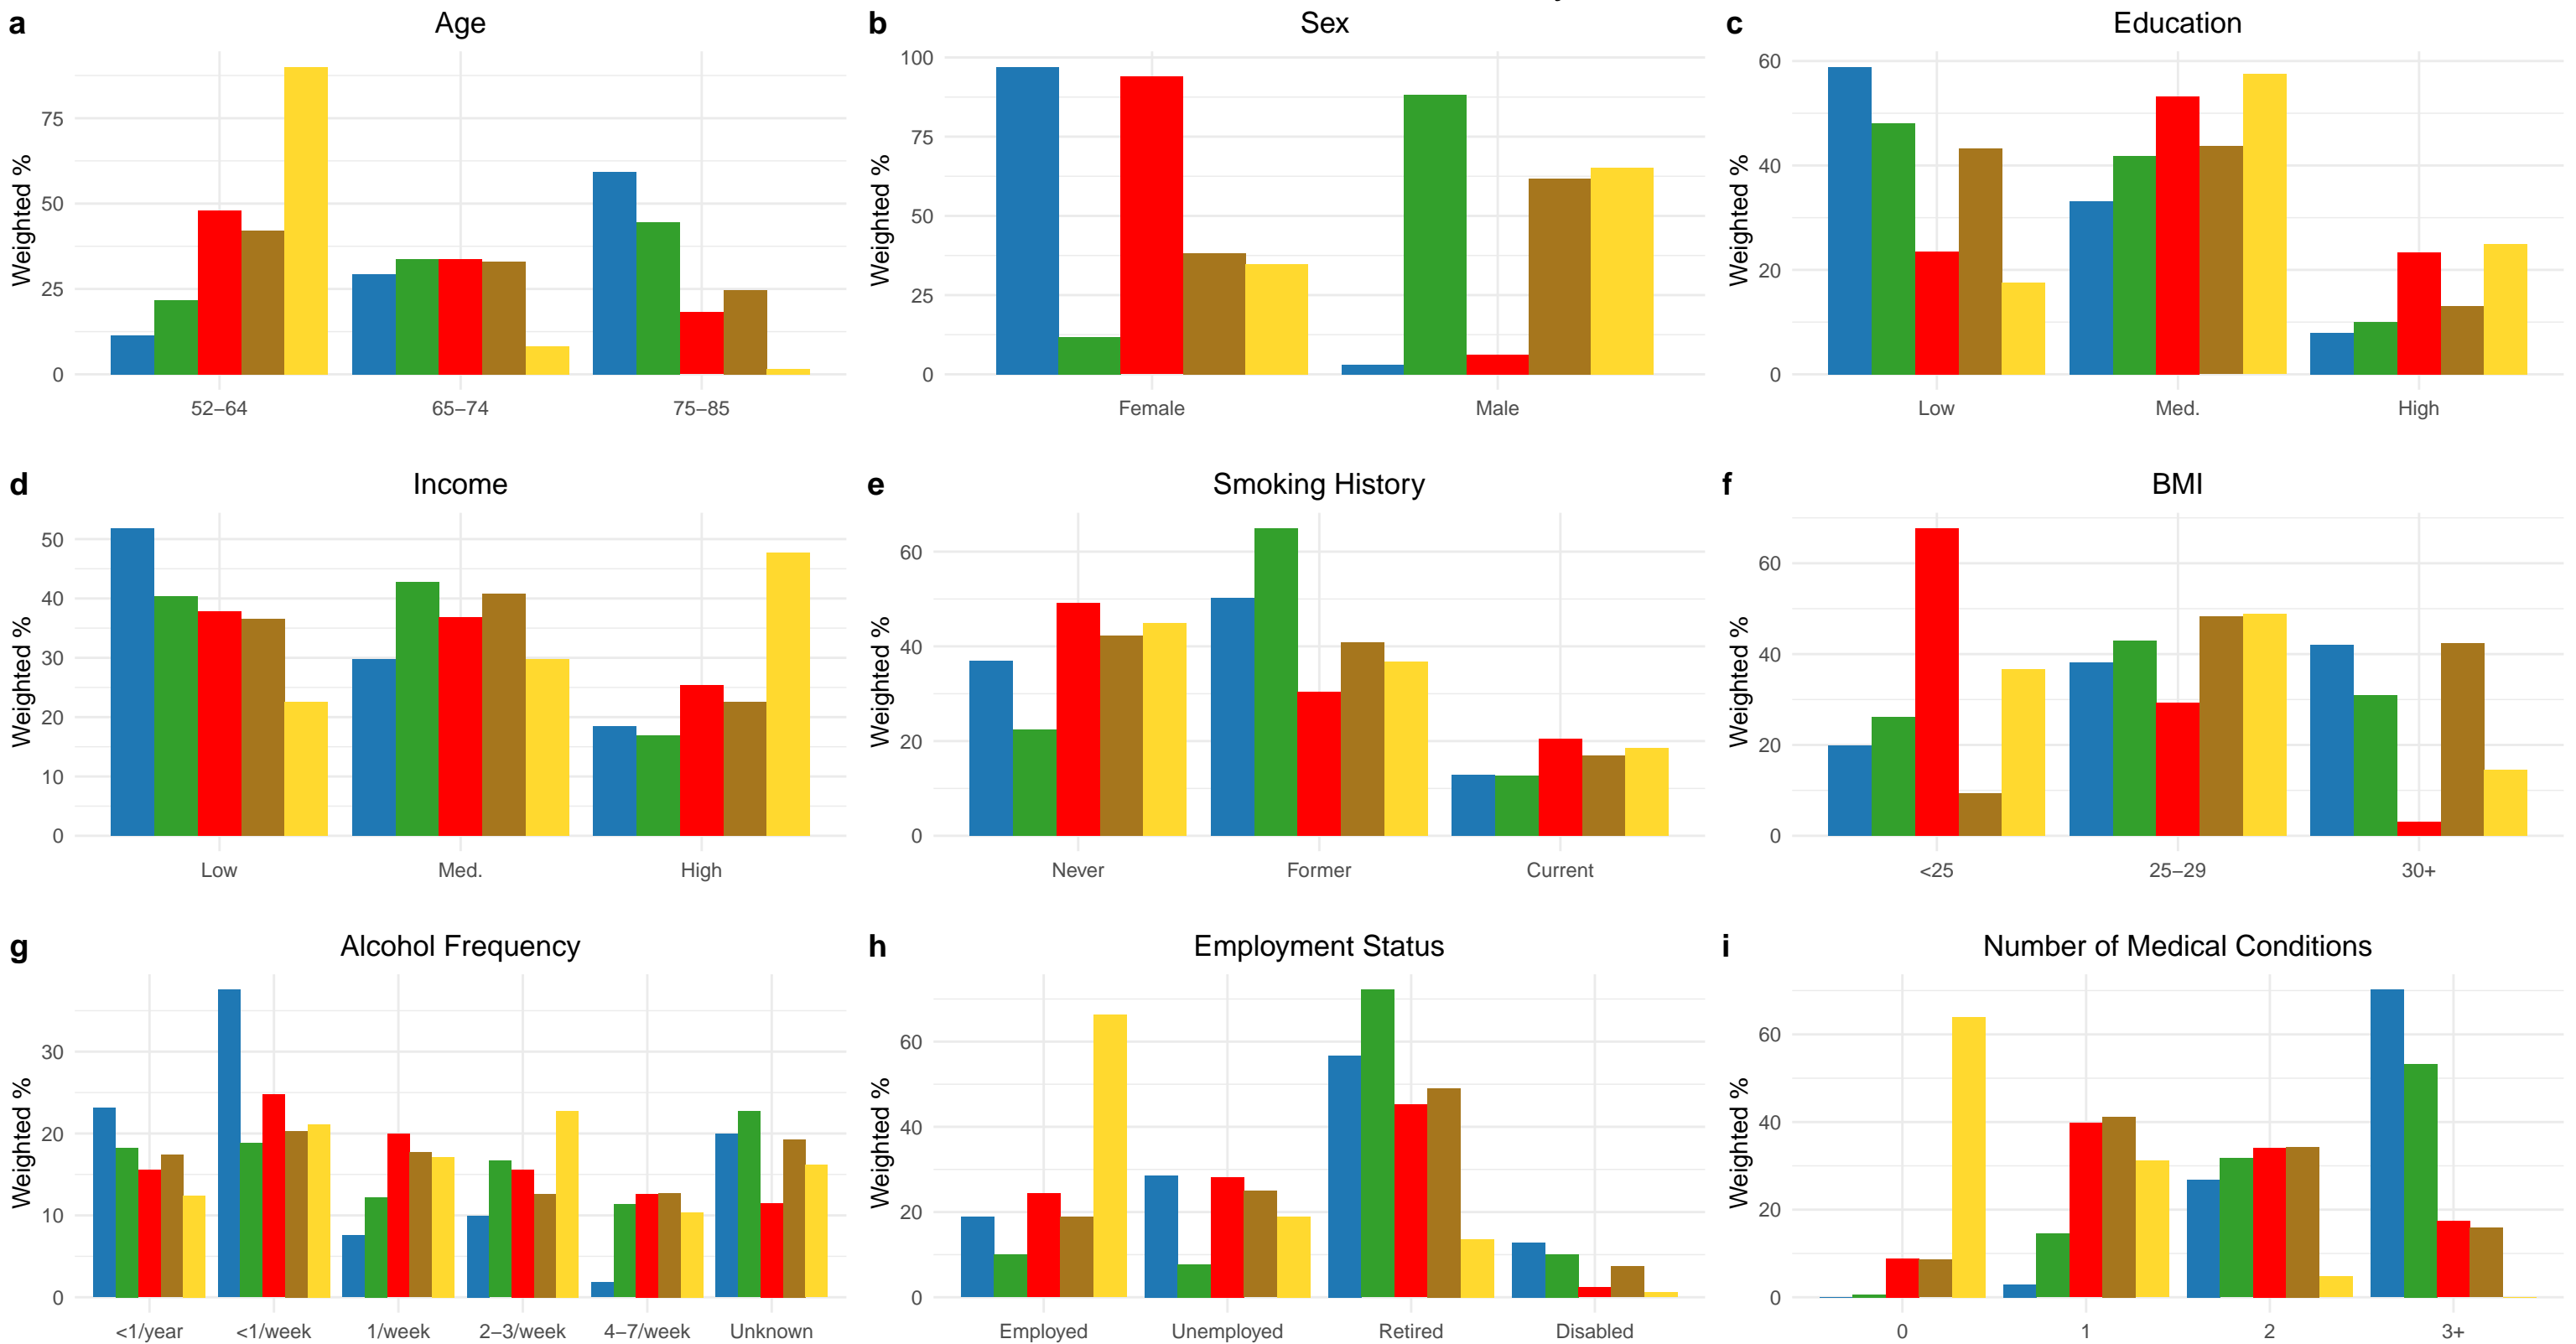

■ Group 1: High Probability of Disease  
■ Group 2: Metabolic, Cardiovascular  
■ Group 3: Osteoporosis, Arthritis, Hypertension (Female)  
■ Group 4: Metabolic, Arthritis  
■ Group 5: Low Probability of Disease
